# Supplementary material for: Tillage-induced short-term soil organic matter turnover and respiration
Source: Copernicus journal article supplement (doi:10.5194/soil-2-475-2016), 2016-09-15
Supplement: Supplementary file 1 [file soil-2-475-2016-supplement.zip]

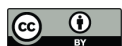

## *Supplement of*

# **Tillage-induced short-term soil organic matter turnover and respiration**

**Sebastian Rainer Fiedler et al.**

*Correspondence to:* Sebastian Rainer Fiedler ([sebastian.fiedler@uni-rostock.de](mailto:sebastian.fiedler@uni-rostock.de))

- [soil-2-475-2016-supplement-title-page.pdf](#)
- [CN.txt](#)
- [CO2-C-flux\\_R.txt](#)
- [hot\\_water.txt](#)
- [mziall\\_R.txt](#)

The copyright of individual parts of the supplement might differ from the CC-BY 3.0 licence.
